# Supplementary material for: Impaired fatty acid import or catabolism in macrophages restricts intracellular growth of Mycobacterium tuberculosis
Source: eLife journal article supplement (doi:10.7554/elife.102980), 2024-12-16

Figure 1 - figure supplement 1A

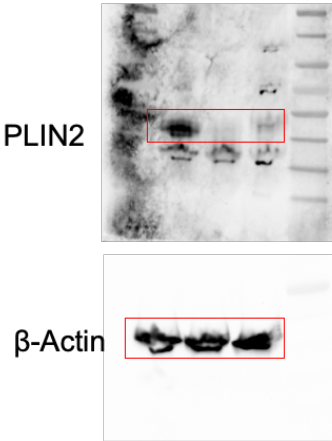

Figure 1 - figure supplement 1B

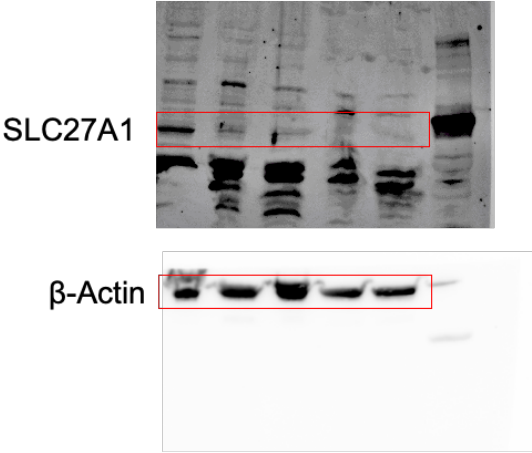

Figure 1 - figure supplement 1D

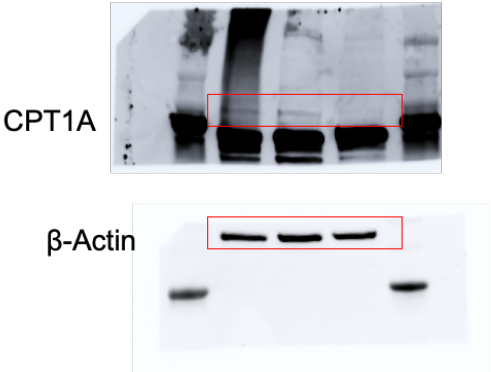

Figure 1 - figure supplement 1E

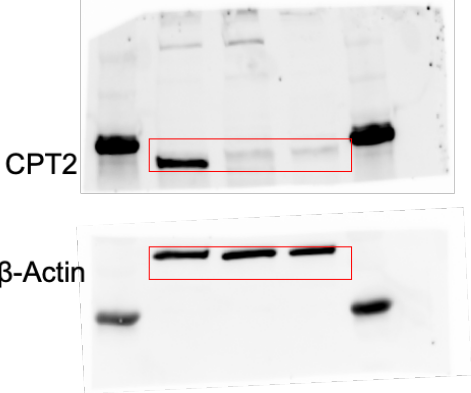

Supplement: fig1-figsupp1-data1 [file elife-102980-fig1-figsupp1-data1-v1.pdf]
