# Supplementary material for: Impaired fatty acid import or catabolism in macrophages restricts intracellular growth of Mycobacterium tuberculosis
Source: eLife journal article supplement (doi:10.7554/elife.102980), 2024-12-16

Figure 3A

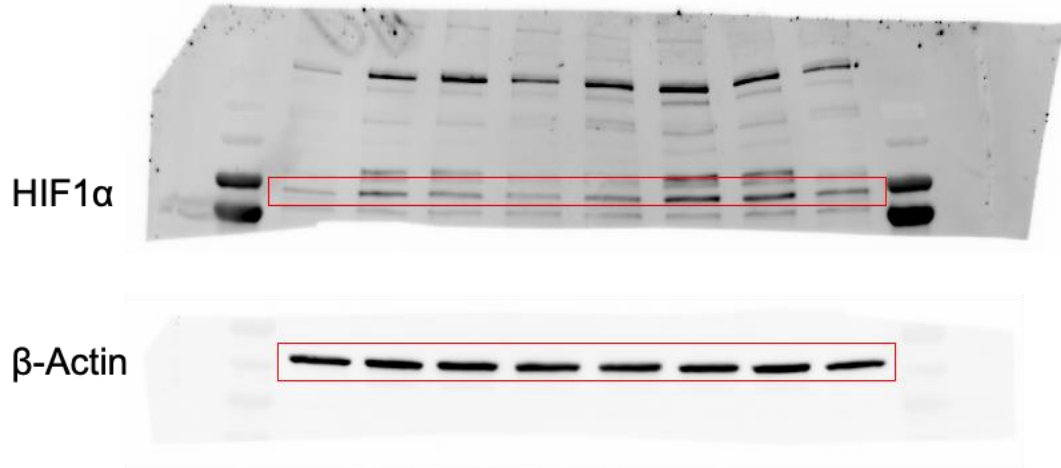

Figure 3C

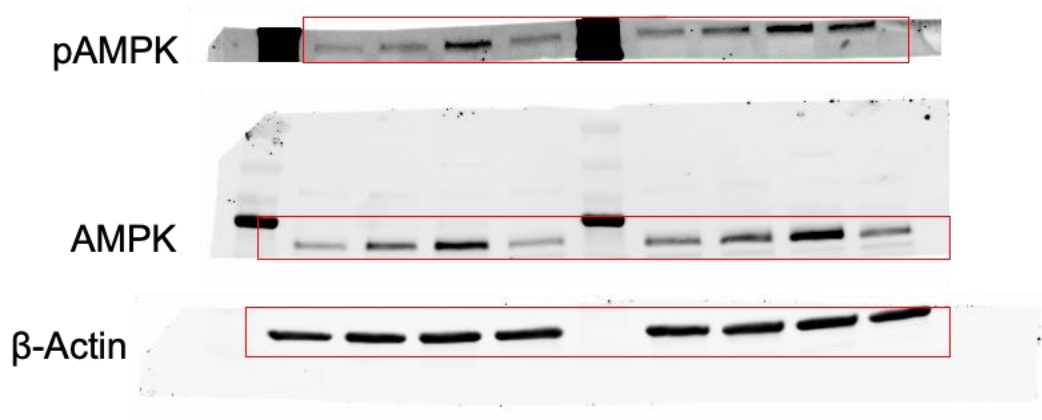

Supplement: fig3-data1 [file elife-102980-fig3-data1-v1.pdf]
