# Supplementary material for: Impaired fatty acid import or catabolism in macrophages restricts intracellular growth of Mycobacterium tuberculosis
Source: eLife. 2025 Mar 13;13:RP102980. doi: 10.7554/eLife.102980 (PMC11906158; doi:10.7554/eLife.102980)
Supplement: Figure 7—figure supplement 1—source data 1. [file elife-102980-fig7-figsupp1-data1.xlsx]

## Sheet: Sheet1
	Mean Fluorescence Intensity (Uninfected)
	Scramble
	40.837	6.043	29.344	25.021	25.744	18.487	31.199	31.611	32.076	35.306	16.933	23.38	25.912	40.666	22.117	19.441	37.881	11.247	28.794	27.458	17.511	29.316	32.902	25.498	37.126	29.613	31.455	8.44	15.339	17.833	24.718	8.932	10.502	24.642	7.669	6.624	25.835	20.141	44.987	13.442	5.729	41.525	14.393	12.889	30.924	21.525	39.243	12.796	26.281
	Mean Fluorescence Intensity (Mtb infected)
	Scramble
	7.885	25.502	29.888	37.73	34.808	15.698	33.884	32.648	11.748	15.404	16.203	8.055	33.276	34.902	12.516	10.429	21.455	20.174	50.162	39.133	30.084	50.495	33.927	55.627	55.984	58.344	22.6	42.217	31.254	46.64	45.977	41.716	46.494	42.258	27.224	28.049	36.725	26.693	27.25	32.766	50.888	32.577	46.041	16.448	31.532	24.527	20.791	18.064	24.043
[truncated: 419 more columns]
